# Supplementary material
Source: publisher site journal article supplement (https://www.dovepress.com/article/472579)
Supplement: Supplementary file 1 [file get_supplementary_file.php]

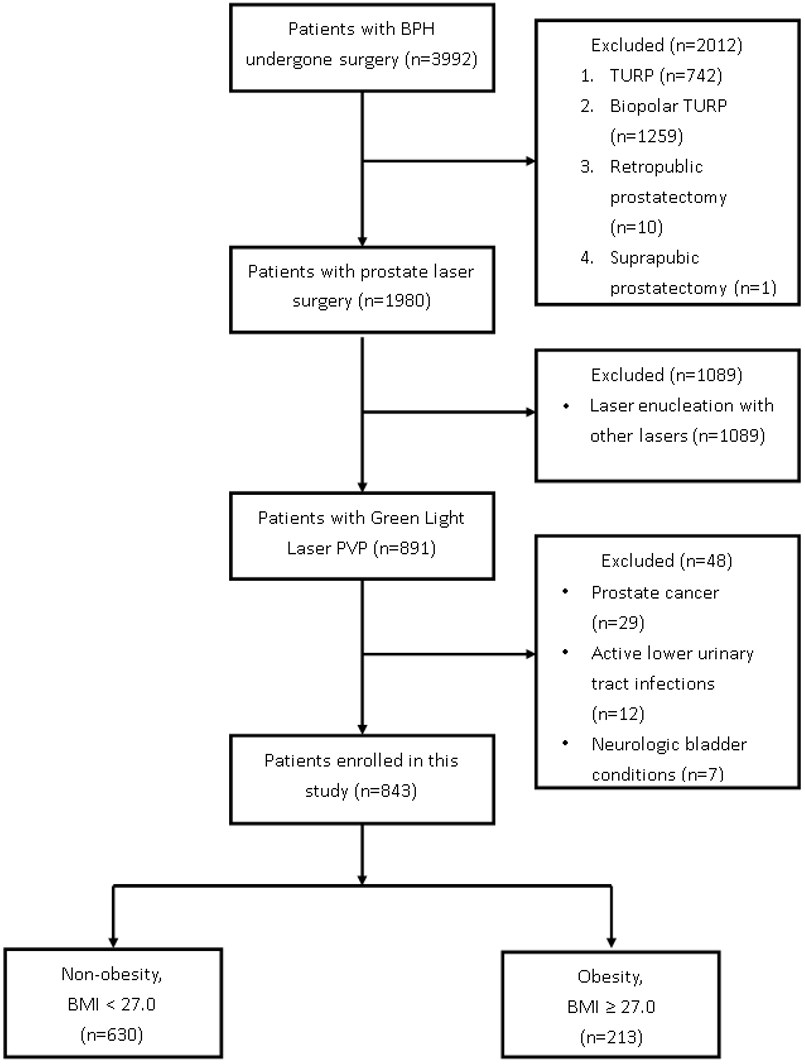


Supplementary Figure 1. Flowchart of the patient enrollment in this study.


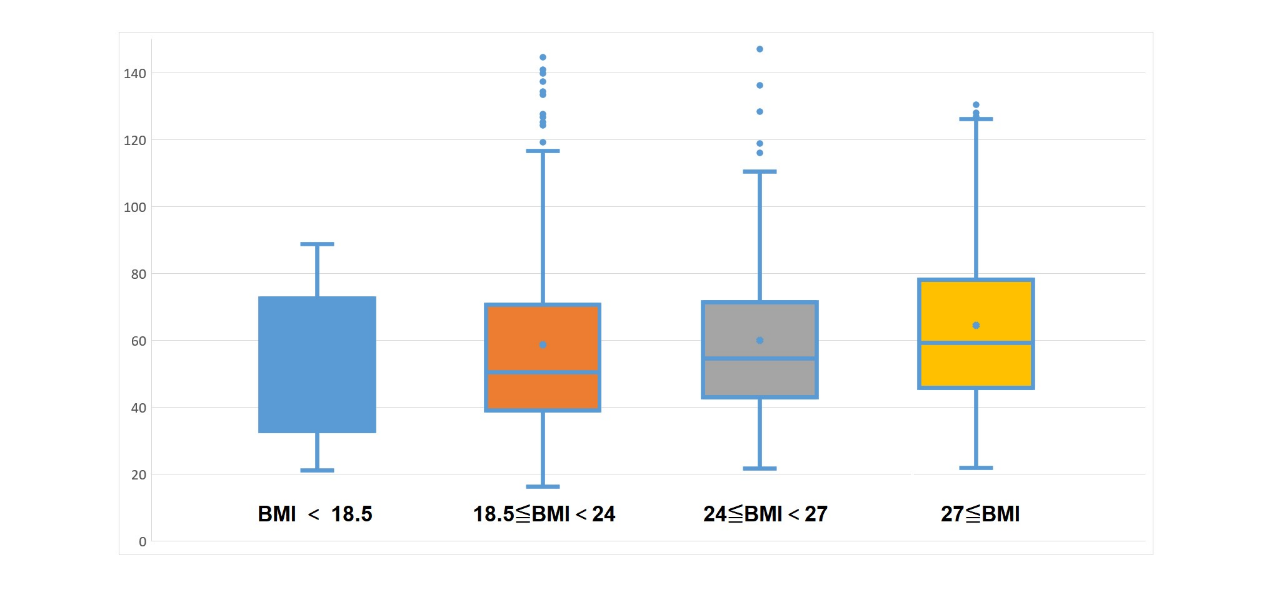


Supplementary Figure 2. TPV in different BMI sub-groups.
